# Supplementary material for: Functional Characterization of TetR-like Transcriptional Regulator PA3973 from Pseudomonas aeruginosa
Source: MDPI journal article supplement (doi:10.3390/ijms232314584), 2022-11-23
Supplement: s1 [file s1]

# Functional characterization of TetR-like transcriptional regulator PA3973 from *Pseudomonas aeruginosa*

Karolina Kotecka, Adam Kawalek, Magdalena Modrzejewska-Balcerek, Jan Gawor, Karolina Zuchniewicz, Robert Gromadka, and Aneta Agnieszka Bartosik \*

Institute of Biochemistry and Biophysics, Polish Academy of Sciences, Pawinskiego 5a, 02-106 Warsaw, Poland

\* corresponding author's email: anetab2@ibb.waw.pl

## SUPPLEMENTARY MATERIALS

**Table S1.** Bacterial strains, plasmids used and constructed in this study.

| strain                        | description                                                                                                                                                                                                                                       | reference  |
|-------------------------------|---------------------------------------------------------------------------------------------------------------------------------------------------------------------------------------------------------------------------------------------------|------------|
| <i>Escherichia coli</i>       |                                                                                                                                                                                                                                                   |            |
| DH5 $\alpha$                  | F <sup>-</sup> $\Phi$ 80 <i>lacZ</i> $\Delta$ M15 $\Delta$ ( <i>lacZYA-argF</i> ) U169<br><i>recA1 endA1 hsdR17</i> (r <sub>K</sub> <sup>-</sup> , m <sub>K</sub> <sup>+</sup> ) <i>phoA</i><br><i>supE44</i> $\lambda$ <i>thi-1 gyrA96 relA1</i> | [1]        |
| S17-1                         | <i>pro</i> $\Delta$ <i>hsdR hsdM</i> <sup>+</sup> <i>recA</i> Tp <sup>R</sup> Sm <sup>R</sup> $\Omega$ RP4-<br>Tc::Mu Kn::Tn7                                                                                                                     | [2]        |
| BL21                          | F <sup>-</sup> <i>ompT hsdS<sub>B</sub></i> (r <sub>B</sub> <sup>-</sup> m <sub>B</sub> <sup>-</sup> ) <i>gal dcm</i> ( $\lambda$ DE3)                                                                                                            | Novagen    |
| <i>Pseudomonas aeruginosa</i> |                                                                                                                                                                                                                                                   |            |
| PAO1161                       | PAO1161 Rif <sup>R</sup> <i>leu</i> <sup>-</sup> , r <sup>-</sup> , m <sup>-</sup>                                                                                                                                                                | [3]        |
| PAO1161                       | PAO1161 Rif <sup>R</sup> r <sup>-</sup> , m <sup>-</sup>                                                                                                                                                                                          | [4]        |
| PAO1161 $\Delta$ PA3973       | PAO1161 Rif <sup>R</sup> with deleted gene<br>PA3973, allele exchange with the use<br>of pKKB60.6                                                                                                                                                 | This study |
| PAO1161 $\Delta$ PA3972-71    | PAO1161 Rif <sup>R</sup> with deleted genes<br>PA3972 and PA3971, allele exchange<br>with the use of pSOB3                                                                                                                                        | This study |
| plasmid                       | description                                                                                                                                                                                                                                       | reference  |
| pBBR1-MCS-1                   | Cm <sup>R</sup> , IncA/C broad-host-range cloning<br>vector, <i>lacZ</i> $\alpha$ -MCS, <i>mob</i> , T7p, T3p                                                                                                                                     | [5]        |
| pAMB9.37                      | pBBR1-MCS-1 derivative with <i>lacI</i> <sup>Q</sup><br><i>tacp</i> , expression vector                                                                                                                                                           | [6]        |
| pABB28.1                      | pBBR1-MCS-1 derivative with <i>lacI</i> <sup>Q</sup><br><i>tacp-flag</i> , expression vector                                                                                                                                                      | [7]        |
| pAKE600                       | Ap <sup>R</sup> , <i>ori</i> <sub>MB1</sub> , <i>ori</i> T <sub>RK2</sub> , <i>sacB</i> , suicide vector                                                                                                                                          | [8]        |
| pKAB240                       | pUC19 derivative with <i>his6-mcs</i> (MunI,<br>HindIII, NotI, XhoI, BamHI)- <i>flag</i>                                                                                                                                                          | [9]        |
| pMEB1                         | pAMB9.37 derivative with modified<br><i>mcs</i>                                                                                                                                                                                                   | [9]        |
| pBGS18                        | Km <sup>R</sup> , <i>ori</i> <sub>MB1</sub> , cloning vector                                                                                                                                                                                      | [10]       |
| pET28a(+)                     | Km <sup>R</sup> , <i>ori</i> <sub>MB1</sub> , T7p, <i>lacO</i> , His <sub>6</sub> -tag, T7 tag,<br>expression vector                                                                                                                              | Novagen    |

|          |                                                                                                                                                                                     |            |
|----------|-------------------------------------------------------------------------------------------------------------------------------------------------------------------------------------|------------|
| pPTO1    | Km <sup>R</sup> , <i>oriV<sub>pSC101</sub></i> , promoter-less <i>xylE</i> cassette                                                                                                 | [11]       |
| pET28mod | Km <sup>R</sup> , <i>ori<sub>MB1</sub></i> , T7p, <i>lacO</i> , His <sub>6</sub> -tag, modified to remove T7 tag                                                                    | [12]       |
| pKKB3.11 | pAMB9.37 derivative, <i>lacI<sup>q</sup>-tacp-PA3973</i> , <i>PA3973</i> amplified with primers #1/#2 and cloned using EcoRI/SacI                                                   | This study |
| pKKB60.3 | pAKE600 derivative with the fragment upstream of <i>PA3973</i> amplified with primers #3/#4 and cloned using BamHI/HindIII                                                          | This study |
| pKKB18.3 | pBGS18 derivative with the fragment downstream of <i>PA3973</i> amplified with primers #5/#6 and cloned using HindIII/EcoRI                                                         | This study |
| pKKB60.6 | pAKE600 derivative with fragments upstream and downstream of <i>PA3973</i> obtained by re-cloning of <i>PA3973</i> downstream region from pKKB18.3 to pKKB60.3 using HindIII/EcoRI  | This study |
| pSOB3.1  | pAKE600 derivative with the fragment upstream of <i>PA3972</i> amplified with primers #7/#8 and cloned using EcoRI/HindIII                                                          | This study |
| pSOB3.4  | pBGS18 derivative with the fragment downstream of <i>PA3971</i> amplified with primers #9/#10 and cloned using HindIII/ BamHI                                                       | This study |
| pSOB3    | pAKE600 derivative with fragments upstream and downstream of <i>PA3972-71</i> obtained by re-cloning of <i>PA3971</i> downstream region from pSOB3.4 to pSOB3.1 using HindIII/BamHI | This study |
| pKKB28.3 | pET28mod derivative encoding His <sub>6</sub> - <i>PA3973</i> , <i>PA3973</i> was amplified with primers #1/#2 and cloned using EcoRI/SacI                                          | This study |
| pMEB265  | pET28mod derivative encoding <i>PA3973</i> -His <sub>6</sub> , <i>PA3973</i> was amplified with primers #1/#11 and cloned using EcoRI/XhoI                                          | This study |
| pMEB251  | pKAB240 derivative with <i>PA3973</i> gene without STOP codon amplified with primers #1/#13 and cloned using                                                                        | This study |

|         | EcoRI/HindIII                                                                                                                   |            |
|---------|---------------------------------------------------------------------------------------------------------------------------------|------------|
| pMEB255 | pMEB1 derivative encoding <i>lacI<sup>q</sup>-tacp-PA3973-flag</i> , <i>PA3973-flag</i> re-cloned from pMEB251 using EcoRI/SalI | This study |
| pMEB267 | pPTOI derivative with <i>PA2468p-xylE</i> , <i>PA2468p</i> amplified with primers #19/#20 and cloned using SphI/BamHI           | This study |
| pMEB269 | pPTOI derivative with <i>PA4156p-xylE</i> , <i>PA4156p</i> amplified with primers #23/#24 and cloned using SphI/BamHI           | This study |

**Table S2** List of primers used in this study.

| nr                             | name     | sequence 5'-3'                                                           |
|--------------------------------|----------|--------------------------------------------------------------------------|
| #1                             | 3973eF   | gcgaattcATGGTCTATCGTGTCACCG                                              |
| #2                             | 3973eR   | gcgagctcTGCAGGTTTCATGAGGGTTC                                             |
| #3                             | 3973mLF  | gcggatcCCGGTCAAGTTCGAAGAGTT                                              |
| #4                             | 3973mLR  | gcaagcttAGACCATGACTGAATCCG                                               |
| #5                             | 3973mPF  | gcaagcttAATAGAGGAACCCTCATGAACCTGCAC                                      |
| #6                             | 3973mPR  | gcgaattcCTCCGGCTTGTGCTGGTTGG                                             |
| #7                             | 3972pF   | gcgaattcAGCCAGCGTGAGGTCGATGC                                             |
| #8                             | 3972upHR | cgcaagcttCAGGTTTCATGAGGGTTCCTC                                           |
| #9                             | 3972dwHF | cgcaagcttTGAGGTAACGGGAGAAAAGC                                            |
| #10                            | 3972dwBR | cgggtaccGGTGACGGTGACGCTGTATTTC                                           |
| #11                            | 3973eR2  | gagctcgtgAGGGTTCCTCGCAGA                                                 |
| #12                            | 3973HR   | gcaaagcttTGAGGGTTCCTCGCAGACAG                                            |
| #13                            | p3973F   | gcgaattcGACGGCGTACTGCTCGAC                                               |
| #14                            | p3973R*  | gcggatccTCACGCTTCAGGCTTTGC                                               |
| #15                            | pPA0061F | gcgaattcgCATGCCGGCCCCGTGGACAGCCCCGC                                      |
| #16                            | pPA0061R | gaggatccGGGGCGGGCTCCGGAGGGT                                              |
| #17                            | pPA0195F | gcgaattcgcacgGATGGGCGGGAATTGTTGG                                         |
| #18                            | pPA0195R | gcggatccTCACGAATCTCCTGCGTGA                                              |
| #19                            | pPA2468F | gcgaattcgcacgGCGCTGGAGATTCCCGGC                                          |
| #20                            | pPA2468R | gcggatccCATGGGAAAGTCGGGGCGA                                              |
| #21                            | pPA2722F | gagaattcgcacgCAATGCGGCGAGGAAAGC                                          |
| #22                            | pPA2722R | gcggatccTTCGTGACTCCTTTGCAAG                                              |
| #23                            | pPA4156F | gcgaattcgcacgCACCACGGTTGATCCATAG                                         |
| #24                            | pPA4156R | gcggatccAGGATCTTCTCCAAATGGG                                              |
| #25                            | pPA4710F | gcgaattcgcacgGCTCGGCAGGGAATGGGA                                          |
| #26                            | pPA4710R | gaggatccGTGGGACTCCTTGGGTCGG                                              |
| #27                            | TproPIIa | CATGTGGTACCATAATAGTTAACGAGAACCCCGG<br>CAGCTGCCGGGGTTATTTTGGTGGTTCCATGGC  |
| #28                            | TproPIIb | CATGGCCATGGAACCACCAAAAATAACCCCGGCA<br>GCTGCCGGGGTTCTCGTTAACTATTATGGTACCA |
| <b>Primers used in RT-qPCR</b> |          |                                                                          |
| #29                            | qPA3973F | GGATCCTGAAGTCGACGAGC                                                     |
| #30                            | qPA3973R | GAAAGCTGGAATGCGCCAC                                                      |
| #31                            | qPA3972F | GGGCAAGTACTGGATCTGCA                                                     |
| #32                            | qPA3972R | CGGAACCTTCCCAGATCGAG                                                     |
| #33                            | qPA3971F | CAGAACGGCTTCATCCATGC                                                     |

|     |               |                        |
|-----|---------------|------------------------|
| #34 | qPA3971R      | TTGAACTCCAGGGTCAGCAC   |
| #35 | qPA3970F      | AGCGGCAGAACTTCCACTACCC |
| #36 | qPA3970R      | GGTGACGGTGACGCTGTATTCG |
| #37 | PA0671qF      | GTCGGCGAACTGCAACTAC    |
| #38 | PA0671qR      | CTGCGGATAGGGTACGTAGG   |
| #39 | qPA3614F      | AACTCATGCTGCTGGACTCC   |
| #40 | qPA3614R      | TGGGTATACAGCGGCTTGATG  |
| #41 | PA5208qF      | CAGGACAAAGTCGCCAATCG   |
| #42 | PA5208qR      | GAGCATCTGGCCTTGTAGCG   |
| #43 | PA5460qF      | CTGCCCATCCACATCTCGCC   |
| #44 | PA5460qR      | AGGTCGTGTTCCGACATTTG   |
| #45 | PA5497qF      | GGGACAAGAAGTACCGGCTC   |
| #46 | PA5497qR      | GAGGCCTTGTCCTCGACATC   |
| #47 | PA2174qF      | AACTGAACCCCGACTTCACG   |
| #48 | PA2174qR      | GAAGCTGCTGCTCTTCAGGA   |
| #49 | D3C65_10195qF | CATTATGGACTTTCGCGCCG   |
| #50 | D3C65_10195qR | TTACAGGCGAATGCGACCAC   |
| #51 | PROCF         | CAGGCCGGGCAGTTGCTGTC   |
| #52 | PROCR         | GGTCAGGCGCGAGGCTGTCT   |

**Table S3.** RNA-seq data for PA3973+ and EV transcriptomes [fold change (FC)  $\leq -2$  or  $\geq 2$ , FDR adjusted  $P \leq 0.01$ ]. Genes identified only in strain PAO1161 but not in PAO1 are described as “not annotated (NA)”.

**Table S4.** Results of ChIP-seq analysis – intergenic regions. 139 PA3973-FLAG ChIP-seq peaks with a fold enrichment (FE) cut-off value of  $\geq 2$  [FDR $<0.01$ ] identified in intergenic regions. RNA-seq data for  $\Delta$ PA3973 vs WT strain presented as a fold change (FC) are included. Genes identified only in PAO1161 strain but not in PAO1 are described as “not annotated (NA)”.

**Table S5.** Results of ChIP-seq analysis – coding regions. 179 PA3973-FLAG ChIP-seq peaks identified in coding regions with a fold enrichment (FE) cut-off value of  $\geq 2$  [FDR $<0.01$ ], obtained by the comparison of PA3973-FLAG ChIP samples with negative control samples. RNA-seq data for  $\Delta$ PA3973 vs WT strain presented as a fold change (FC) are included. Genes identified only in PAO1161 strain but not in PAO1 are described as “not annotated (NA)”.

**Table S6.** RNA-seq data for transcriptomes of PA3973-deficient cells vs. WT strain [fold change (FC)  $\leq -2$  or  $\geq 2$ , FDR adjusted  $P \leq 0.01$ ]. RNA-seq data for PA3973+ vs EV+ are presented for comparison. Gene identified only in strain PAO1161, but not in PAO1 is described as “not annotated (NA)”.

## REFERENCES TO SUPPLEMENTARY MATERIAL

1. Hanahan, D. Studies on transformation of *Escherichia coli* with plasmids. *J. Mol. Biol.* **1983**, 166, 557–580.
2. Simon, R.; O’Connell, M.; Labes, M.; Pühler, A. Plasmid vectors for the genetic analysis and manipulation of *Rhizobia* and other Gram-negative bacteria. *METHODS IN ENZYMOLOGY* **1986**, 118.
3. Bartosik, A.A.; Mierzejewska, J.; Thomas, C.M.; Jagura-Burdzy, G. ParB deficiency in *Pseudomonas aeruginosa* destabilizes the partner protein ParA and affects a variety of

- physiological parameters. *Microbiology (Reading, Engl.)* **2009**, *155*, 1080–1092, doi:10.1099/mic.0.024661-0.
4. Kawalek, A.; Kotecka, K.; Modrzejewska, M.; Gawor, J.; Jagura-Burdzy, G.; Bartosik, A.A. Genome sequence of *Pseudomonas aeruginosa* PAO1161, a PAO1 derivative with the ICEPae1161 integrative and conjugative element. *BMC Genomics* **2020**, *21*, 14, doi:10.1186/s12864-019-6378-6.
  5. Kovach, M.E.; Elzer, P.H.; Hill, D.S.; Robertson, G.T.; Farris, M.A.; Roop, R.M.; Peterson, K.M. Four new derivatives of the broad-host-range cloning vector pBBR1MCS, carrying different antibiotic-resistance cassettes. *Gene* **1995**, *166*, 175–176, doi:10.1016/0378-1119(95)00584-1.
  6. Ludwiczak, M.; Dolowy, P.; Markowska, A.; Szarlak, J.; Kulinska, A.; Jagura-Burdzy, G. Global transcriptional regulator KorC coordinates expression of three backbone modules of the broad-host-range RA3 plasmid from IncU incompatibility group. *Plasmid* **2013**, *70*, 131–145, doi:10.1016/j.plasmid.2013.03.007.
  7. Kotecka, K.; Kawalek, A.; Kobylecki, K.; Bartosik, A.A. The AraC-type transcriptional regulator GliR (PA3027) activates genes of glycerolipid metabolism in *Pseudomonas aeruginosa*. *Int J Mol Sci* **2021**, *22*, 5066, doi:10.3390/ijms22105066.
  8. El-Sayed, A.K.; Hotherhall, J.; Thomas, C.M. Quorum-sensing-dependent regulation of biosynthesis of the polyketide antibiotic mupirocin in *Pseudomonas fluorescens* NCIMB 10586. *Microbiology (Reading, Engl.)* **2001**, *147*, 2127–2139, doi:10.1099/00221287-147-8-2127.
  9. Modrzejewska, M.; Kawalek, A.; Bartosik, A.A. The LysR-type transcriptional regulator BsrA (PA2121) controls vital metabolic pathways in *Pseudomonas aeruginosa*. *mSystems* **2021**, *6*, e0001521, doi:10.1128/mSystems.00015-21.
  10. Spratt, B.G.; Hedge, P.J.; te Heesen, S.; Edelman, A.; Broome-Smith, J.K. Kanamycin-resistant vectors that are analogues of plasmids pUC8, pUC9, pEMBL8 and pEMBL9. *Gene* **1986**, *41*, 337–342, doi:10.1016/0378-1119(86)90117-4.
  11. Thorsted, P.B.; Shah, D.S.; Macartney, D.; Kostelidou, K.; Thomas, C.M. Conservation of the genetic switch between replication and transfer genes of IncP plasmids but divergence of the replication functions which are major host-range determinants. *Plasmid* **1996**, *36*, 95–111, doi:10.1006/plas.1996.0037.
  12. Lukaszewicz, M.; Kostelidou, K.; Bartosik, A.A.; Cooke, G.D.; Thomas, C.M.; Jagura-Burdzy, G. Functional dissection of the ParB Homologue (KorB) from IncP-1 plasmid RK2. *Nucleic Acids Res.* **2002**, *30*, 1046–1055, doi:10.1093/nar/30.4.1046.
